# Supplementary material for: Stretchable triboelectric nanogenerator with exteroception-visualized multifunctionality
Source: Royal Society of Chemistry journal article supplement (doi:10.1039/d1ta09825j), 2022-01-01
Supplement: d1ta09825j2.pdf [file d1ta09825j2.pdf]

## Supporting Information

### Stretchable Triboelectric Nanogenerator with Exteroception- Visualized Multifunctionality

Qingyu Meng,<sup>†a</sup> Minghao Zhang,<sup>†a</sup> Ruixin Tang,<sup>a</sup> Wenjing Jin,<sup>a</sup> Jiayi Zhang,<sup>a</sup> Zhuyue Lan,<sup>a</sup> Shitao Shi,<sup>a</sup> Xiaoping Shen,<sup>\*a</sup> and Qingfeng Sun<sup>\*a</sup>

<sup>a</sup>College of Chemistry and Materials Engineering, Zhejiang A&F University, Hangzhou 311300, People's Republic of China

<sup>\*</sup>Corresponding authors: Xiaoping Shen, E-mail: xpshen@zafu.edu.cn; Qingfeng Sun, E-mail: qfsun@zafu.edu.cn

#### Materials and chemicals

HPC with an average MW of 33900 was supplied by Nisso Chemical Europe GmbH (NCE, Düsseldorf, Germany). Glycerol, sodium chloride, trichlorooctadecylsilane (TCI) and 2,2,4-trimethylpentane were purchased from Aladdin Chemical Co. (Shanghai, China). PDMS and Sylgard 184 were supplied by Dow Corning Co., Ltd. (Midland, United States). PDMS films (KYN-100 $\mu$ m) were obtained from Bald Advanced Materials Company (Hangzhou, China). Translucent polyester film was purchased from Shunhe Packing Co., Ltd (Guangdong, China). Silicon wafers of *ca.* 10 cm diameter and 1 mm thickness were supplied by Jiutao Sensor Technology Co., Ltd (Suzhou, China) and AZP4620 as the photoresist by Shenzhen QY Opto-Electronics (Shenzhen, China).

#### Fabrication of stretchable PDMS molds

After DRIE etching, the positive-acting photoresist was removed by oxygen plasma etching and the micropatterned wafer was soaked in 1 mM TCI dissolved in 2,2,4-trimethylpentane for 30 min. PDMS and the curing agent Sylgard 184 (at a mass ratio of 12:1) mixed with black dye (Cannon, Japan) was poured into a petri dish with the

inverted superhydrophobic wafer pressed on the surface and two PET films (500  $\mu\text{m}$  - 2 mm) as the thickness gage. The mixture was placed in a vacuum container to remove air bubbles and kept at room temperature (25  $^{\circ}\text{C}$ ) for 72 h for solidification. Silver wire was embedded in the groove before solidification, and the resulting PDMS molds were treated with  $\text{O}_2$  plasma.

### **Characterization**

The morphology and elemental mapping of HPC LCs were characterized by a SU8010 microscope (Hitachi, Japan) after sputtering the samples with a thin gold layer (Emitech, K550). The contact angles (CAs) of HPC/ $\text{H}_2\text{O}$ /Gly liquids (15 wt% HPC and 0-18 wt% Gly relative to HPC) were determined on an OCA 100 contact angle test system (DataPhysics, Germany) using 5  $\mu\text{L}$  of liquid each time. Reflectance spectra were collected by an 7-channel spectrometer (Avantes, AvaSpec-ULS2048CL, holland) with an in-situ fiber optic probe. Stereomicroscopy was carried out using a Keyence VHX-1000 digital microscope (Osaka, Japan). A rheometer (ARES-G2, TA Instruments, Delaware, USA) equipped with a parallel-plate fixture (25 mm in diameter) was used to study the dynamic rheological behavior of HPC LC at a heating rate of  $1^{\circ}\text{C min}^{-1}$ .

The voltage and charge quantity were recorded by an electrometer (Huace EST102, Beijing, China) with the force applied by different weights. To demonstrate a wearable self-charging powered package, the overlapping-joint-structure HPC-based LC-TENG was used to charge a commercial capacitor (2.2  $\mu\text{F}$ ) through a bridge rectifier. The voltage changes in these capacitors were discharged by connecting to a resistor and measured using a digital source meter (Fluke 8846A, Shanghai, China).

Finite Element Method (FIM) was employed to simulate the processes such as water evaporation, mechanical deformation and electric field distribution using COMSOL Multiphysics.

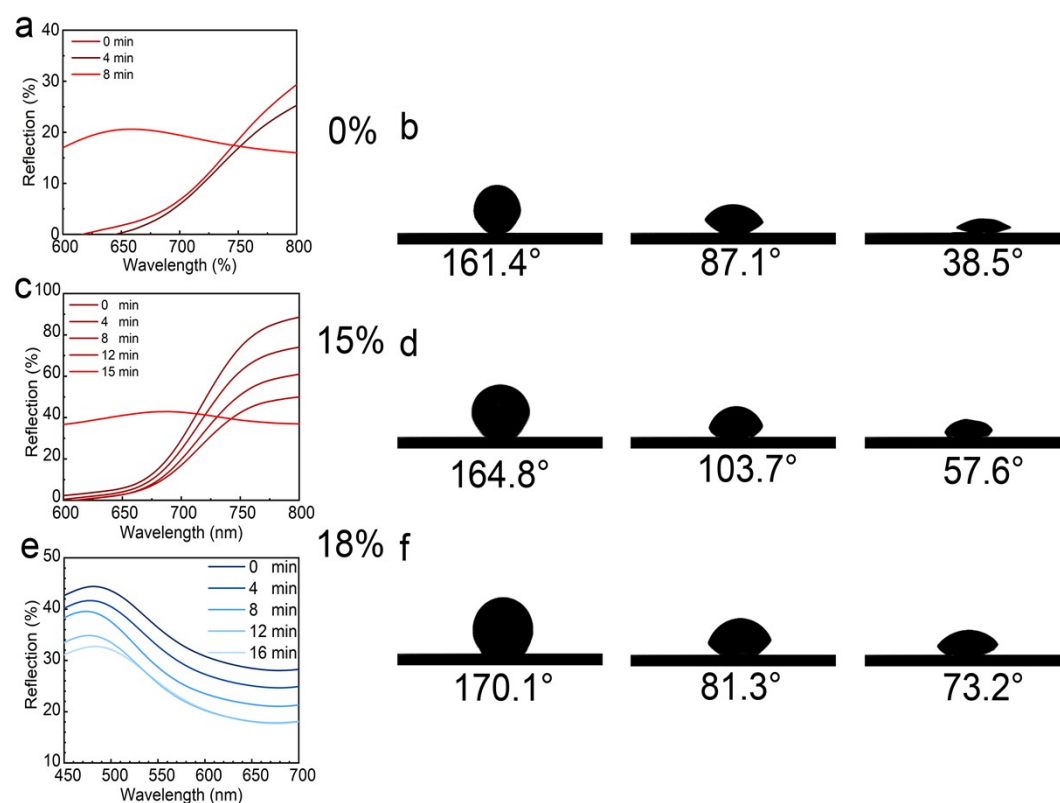

**Figure S1.** a, c, e) The tuning of the structural color of the HPC/Gly/ion LC with different glycerol contents (0-18 wt% relative to HPC). b, d, f) Corresponding contact angles (CAs) of the LC precursor droplets measured on a PDMS substrate as a function of time.

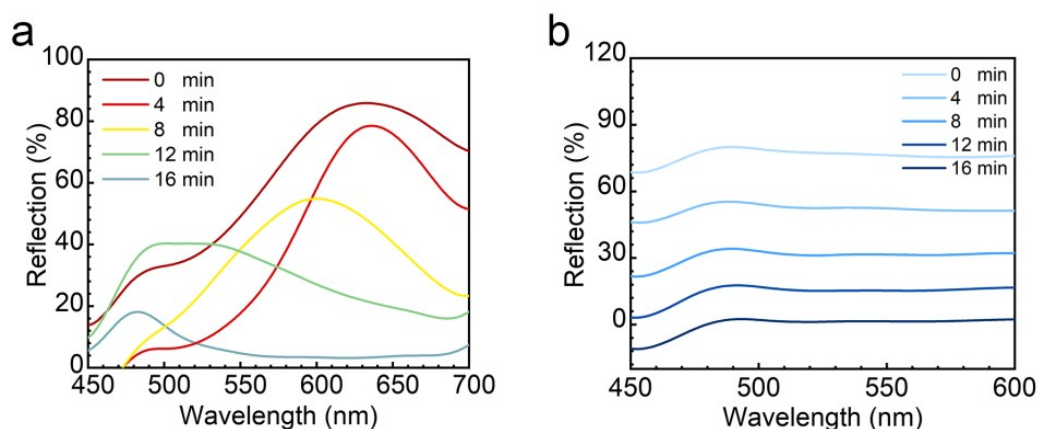

**Figure S2.** The tuning of the structural color of the HPC/polyol/ion LC with a) 15 wt% glycol or b) 5 wt% sorbitol.

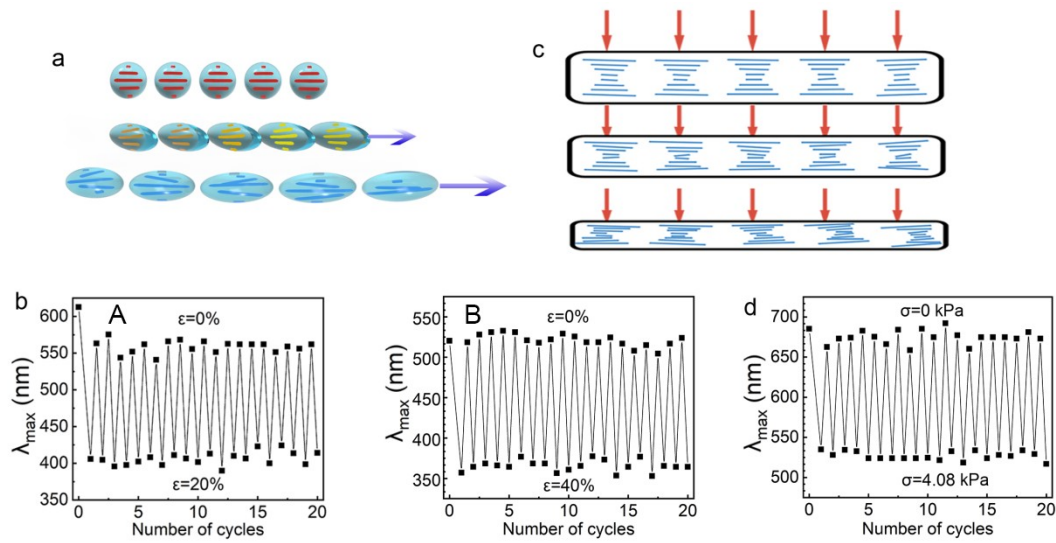

**Figure S3.** a) Schematic representation of the changes of helicoidal domains and b) Change of  $\lambda_{\max}$  during stretching. c) Schematic representation and d) Change of  $\lambda_{\max}$  during compression.

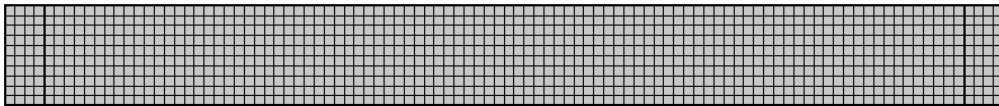

**Figure S4.** Grids in the LC stripe used for tensile deformation behavior algorithms.

Colors recorded by the camera consist of three 8-bits values for the three primary channels R (red), G (green) and B (blue). R is set as (255, 0, 0), G is set as (0, 255, 0) and B is set as (0, 0, 255). A color diagram with coordinates  $r$  on the red channel,  $g$  on the green channel and  $b$  on the blue channel is represented by  $(r, g, b)$  in RGB coordinates, given by  $r R + g G + b B$ . On the RGB triangle plot, R, G and B vectors are set at a radius equal to 1 and at an angle of  $120^\circ$  from each other (the red, green and blue diamonds and lines), to make an equal re- partition.

$$x_R=1$$

$$y_R=0$$

$$x_G=\cos(120^\circ)$$

$$y_G=\sin(120^\circ)$$

$$x_B=-\cos(120^\circ)$$

$$y_B=-\sin(120^\circ)$$

$$\alpha=r \times x_R + g \times x_G + b \times x_B / r + g + b$$

$$\beta=r \times y_R + g \times y_G + b \times y_B / r + g + b$$

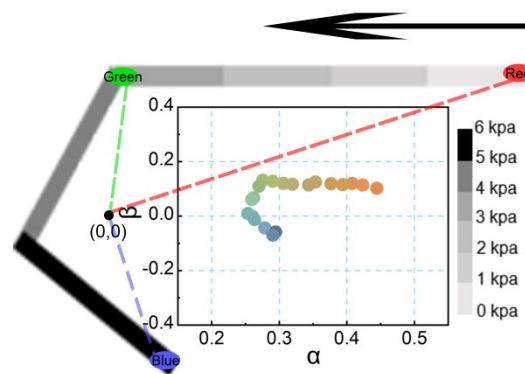

**Figure S5.** Ternary diagrams with primary color axes, which was calculated using the above equations.

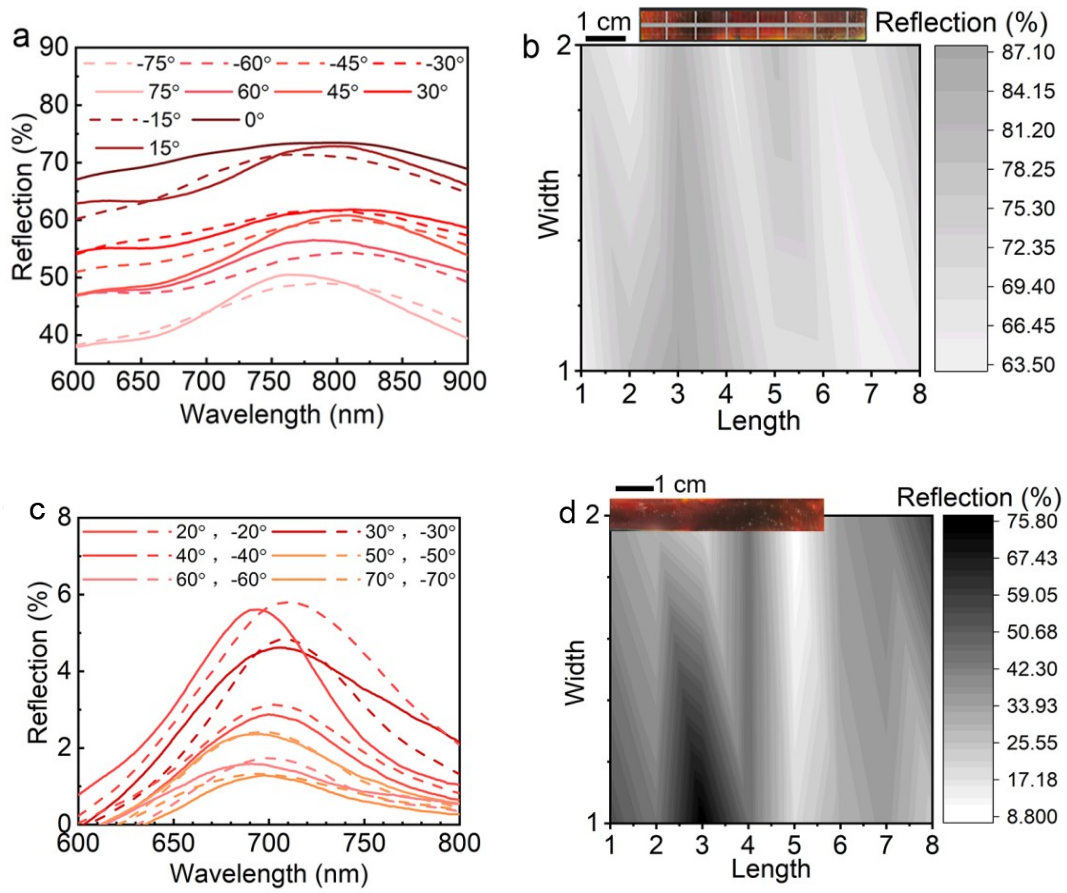

**Figure S6.** a, c) Reflectance spectra and b, d) reflected intensity distribution of the a, b) HPC/Gly/ion and c, d) HPC/ion sensors.

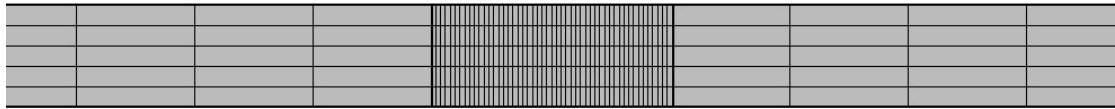

**Figure S7.** Grids in the LC stripe used for compressive stress transferring behavior algorithms.

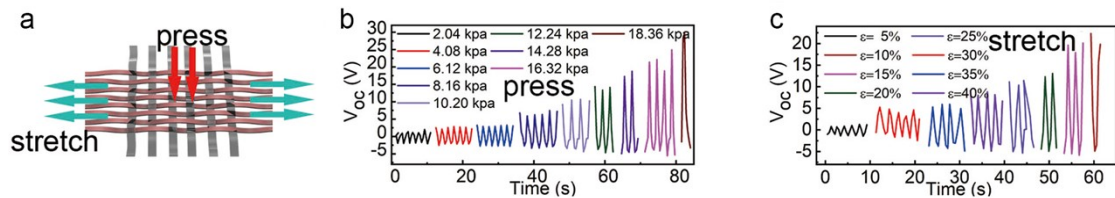

**Figure S8.** a) Schematic diagram and electrical output during b) compressing and c) stretching tests

(sample: ca. 5 cm  $\times$  4 cm).

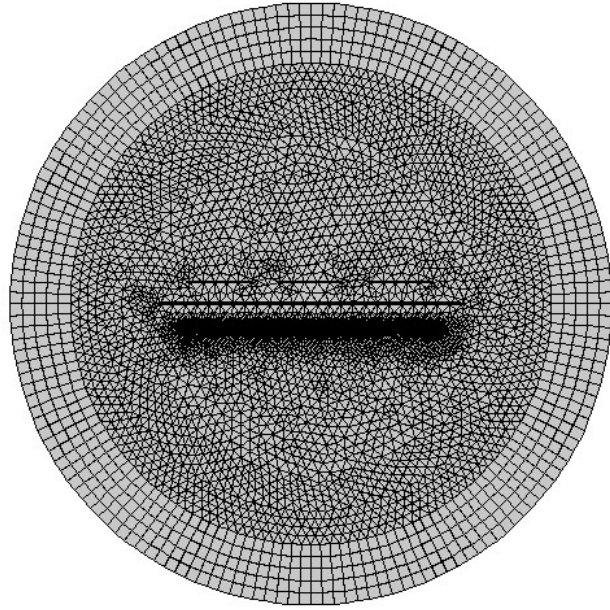

**Figure S9.** Grids in the LC-TENG device using for electric field distribution algorithms.

#### **Electricity generating process**

To obtain a more quantitative understanding of the electricity generating process, we establish a corresponding theoretical electric potential distribution model between the polyester films and the LC-PDMS unit by a simple finite element simulation using COMSOL Multiphysics (Figure 6 and Figure S9). Due to contact-electrification effect, charges will be transferred between PDMS and polyester layers. When these two materials are in full contact, the whole device is electric neutral (Figure 6f-I, g-I). When the two materials are separated, the positive charges in the LC gel move near the PDMS film to maintain the electrostatic balance of the LC-PDMS unit (Figure 6f-II, g-II). In the meantime, the LC gel near the silver wire is negatively charged, resulting in a electron current from the wire to the ground. When the distance between PDMS and polyester exceeds a certain value, no current flows between the LC gel and the ground due to the new-formed charge balance (Figure 6f-III, g-III). When PDMS contacts the polyester again, the positive charges in the LC move from near the PDMS to near the wire underneath (Figure 6f-IV, g-IV).
